# Supplementary material for: Simple Derivation of Spinal Motor Neurons from ESCs/iPSCs Using Sendai Virus Vectors
Source: PubMed Central journal article supplement (PMC5363292; doi:10.1016/j.omtm.2016.12.007), 2017-01-10
Supplement: mmc1.pdf [file mmc1.pdf]

**OMTM, Volume 4**

**Supplemental Information**

**Simple Derivation of Spinal Motor Neurons  
from ESCs/iPSCs Using Sendai Virus Vectors**

**Kazuya Goto, Keiko Imamura, Kenichi Komatsu, Kohnosuke Mitani, Kazuhiro Aiba, Norio Nakatsuji, Makoto Inoue, Akihiro Kawata, Hirofumi Yamashita, Ryosuke Takahashi, and Haruhisa Inoue**

## Supplemental Information

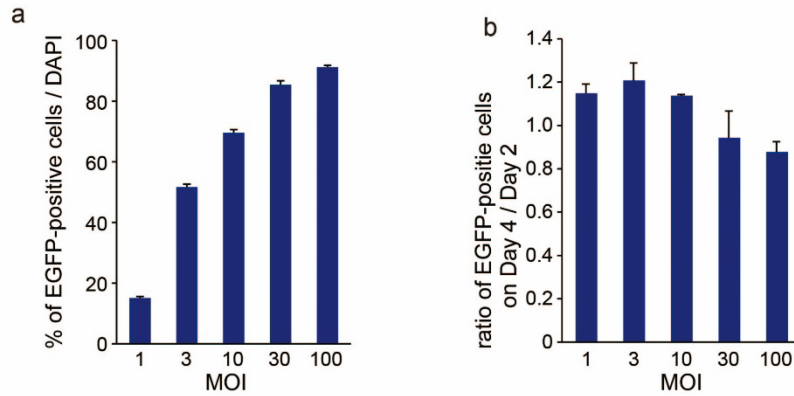

**Fig. S1. Transduction of SeV-EGFP vector into iPSCs.**

(a) Transduction efficiency of SeV-EGFP into iPSCs. Percentages of EGFP-positive cells on Day 2 were  $15.1 \pm 0.5\%$ ,  $51.7 \pm 1.0\%$ ,  $69.6 \pm 1.1\%$ ,  $85.4 \pm 1.3\%$ , and  $91.2 \pm 0.6\%$  at MOIs of 1, 3, 10, 30, and 100, respectively. Error bars are SEM,  $n = 3$ . (b) Ratios of EGFP-positive cells on Day 4 to Day 2 were  $1.15 \pm 0.04$ ,  $1.21 \pm 0.08$ ,  $1.14 \pm 0.01$ ,  $0.94 \pm 0.12$ , and  $0.88 \pm 0.05$  at MOIs of 1, 3, 10, 30, and 100, respectively. Error bars are SEM,  $n = 3$ .

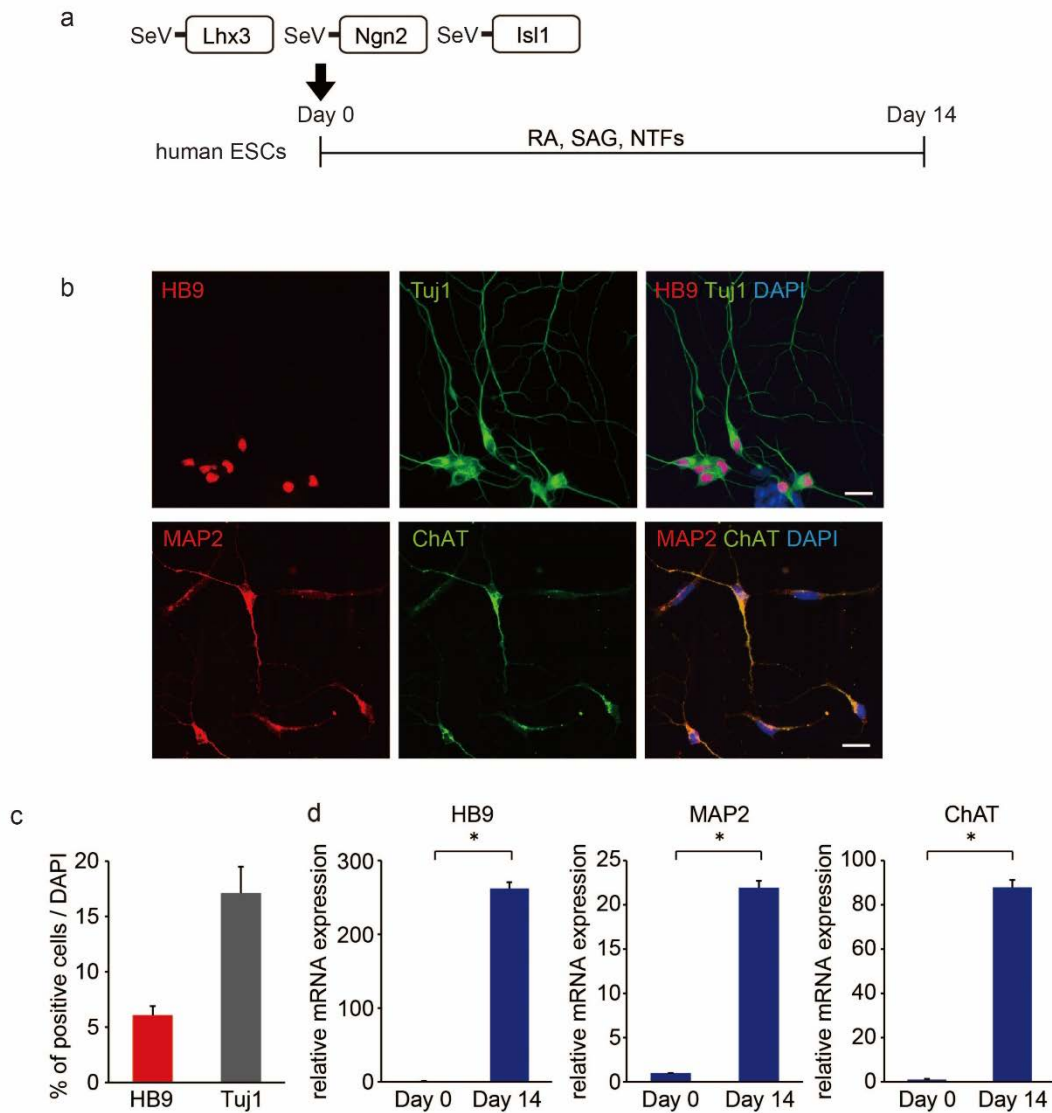

**Figure S2. Differentiation of MNs from ESCs with three separate Sendai virus vectors.**

(a) Outline of the experimental protocol to generate MNs using the single vectors SeV-L, SeV-N, and SeV-I in H9 ESCs. (b) Immunofluorescence staining showed the expression of MN markers (HB9 and ChAT) and neuronal markers (Tuj1 and MAP2). Scale bars, 20  $\mu$ m. (c) Differentiation efficiency of MNs in SeV-infected cells. The percentages of HB9-positive and Tuj1-positive cells per total cells on Day 14 were  $6.1 \pm 0.8\%$  and  $17.1 \pm 2.4\%$ , respectively. (d) The qPCR analysis

of differentiated cells on Days 0 and 14 for MN markers (HB9 and ChAT) and neuronal marker (MAP2). Student's t-test was used for statistical comparison. \* $p < 0.05$  versus Day 0. Error bars are SEM,  $n = 3$ .

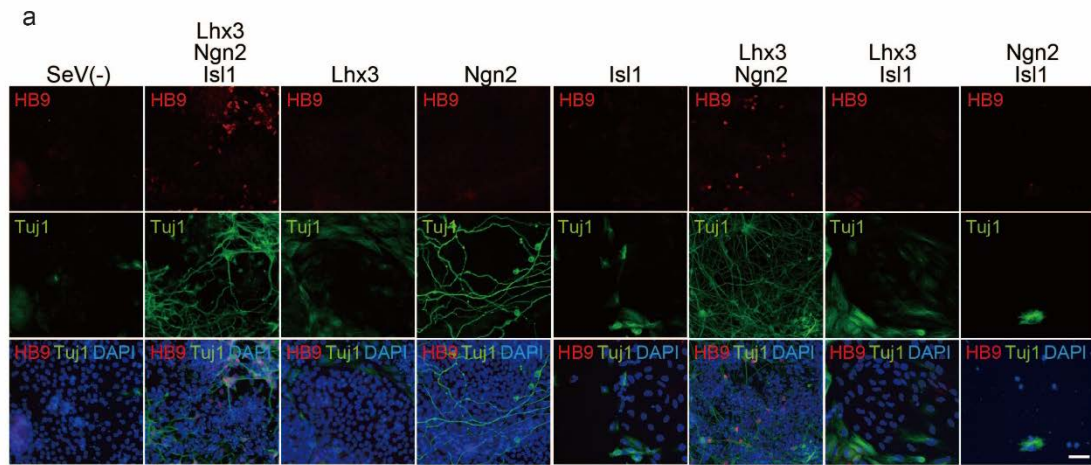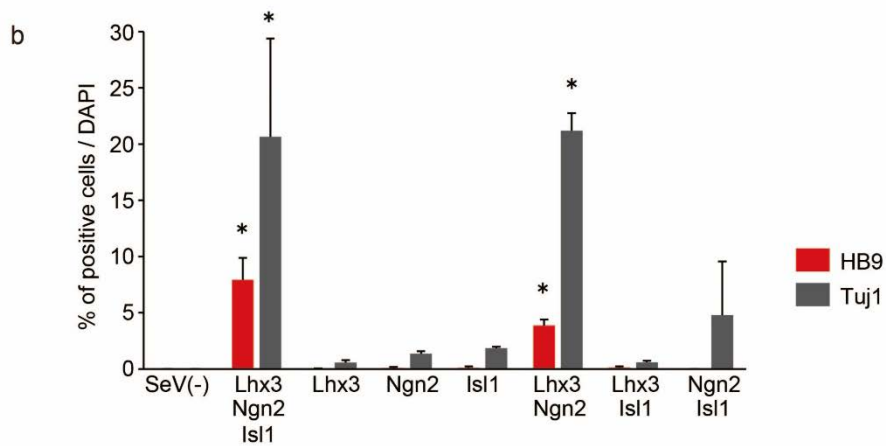

**Figure S3. Comparison of combinations of three SeV vectors.**

(a) Immunofluorescence staining of cells differentiated by various combinations of SeV-Lhx3 (Lhx3), SeV-Ngn2 (Ngn2), and SeV-Isl1 (Isl1) for HB9 (*top*) and Tuj1(*middle*); bottom row shows a merging of these images along with DAPI-stained nuclei (*blue*). Scale bar, 40  $\mu$ m. (b) Percentages of HB9- (MNs; red) and Tuj1- (neurons; gray) positive cells derived by various combinations of the transcription factors. Data were analyzed by one-way ANOVA and Dunnett's post-hoc analysis. \* $p < 0.05$ . Error bars are SEM,  $n = 3$ .

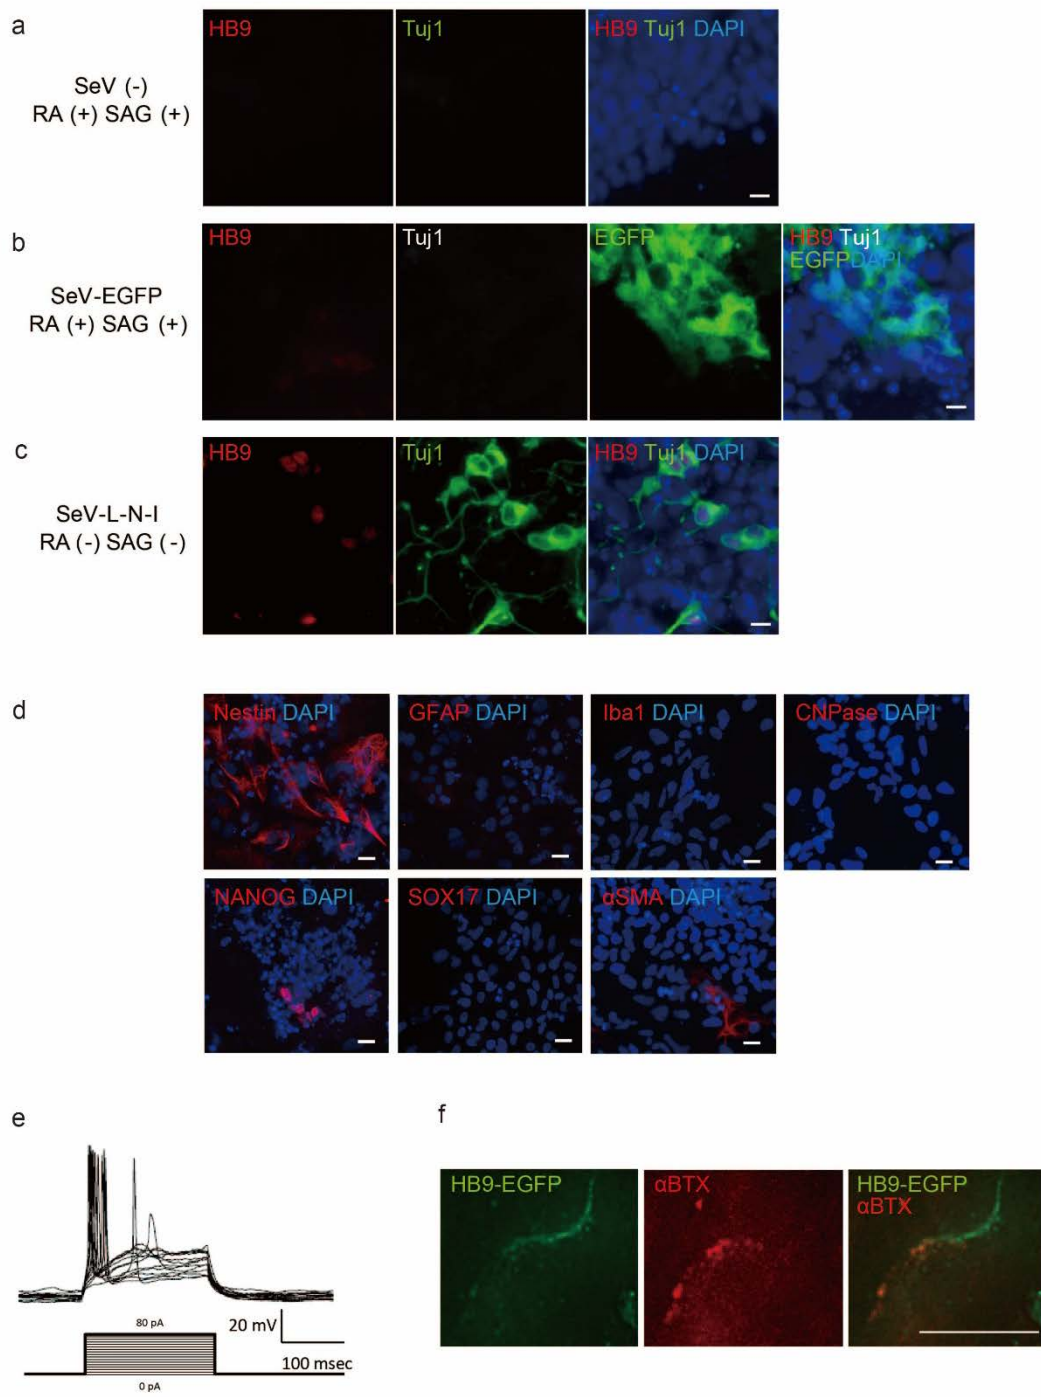

**Fig. S4. Further analysis of cell culture by a single SeV vector encoding Lhx3, Ngn2, and Isl1.**

(a) Differentiation of iPSCs using the current protocol without SeV vector. Tuj1- or HB9-positive cells were not observed. Scale bar, 20  $\mu$ m. (b) Differentiation of iPSCs using the current protocol with SeV-EGFP vector. Tuj1- or HB9-positive cells were not observed. Scale bar, 20  $\mu$ m. (c) Immunostaining of cells with SeV-L-N-I without RA and SAG. HB9-positive cells were  $48.5 \pm 1.5\%$  of neurons. Scale bar, 20  $\mu$ m. (d) Immunostaining for Nestin, GFAP, Iba1, CNPase, NANOG, SOX17, and  $\alpha$ SMA on Day 14. The majority of non-neural cells were positive for Nestin. The number of Nestin-positive, NANOG-positive, and  $\alpha$ SMA-positive cells in DAPI-stained total cells were  $67.8 \pm 2.7\%$ ,  $0.49 \pm 0.26\%$ , and  $0.27 \pm 0.11\%$ , respectively. Stainings for GFAP, SOX17, Iba1, and CNPase were negative. Scale bars, 20  $\mu$ m. (e) Current-clamp recordings of action potentials on Day 21. (f) Double immunostaining against GFP for MNs and  $\alpha$ -bungarotoxin for acetylcholine receptors on Day 21. Scale bar, 10  $\mu$ m.

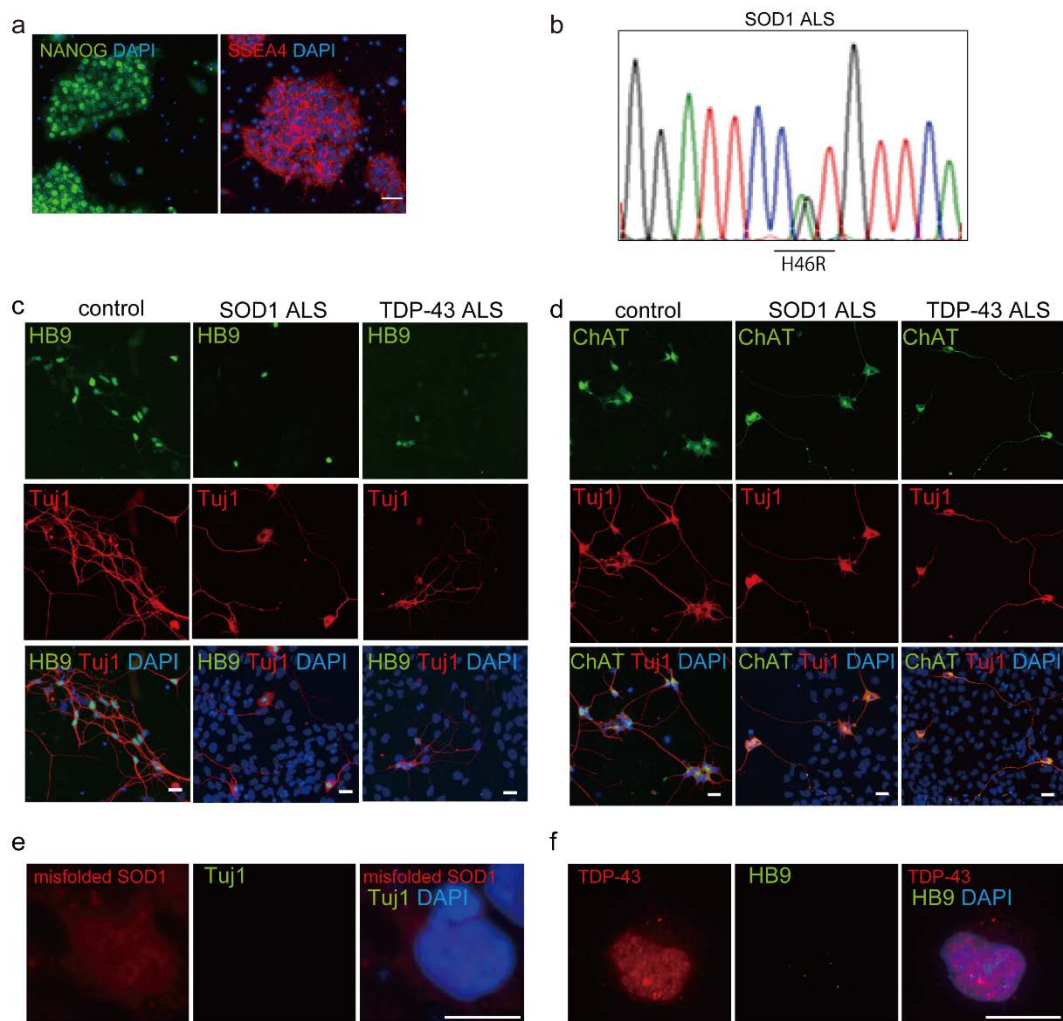

**Figure S5. Differentiation of MNs from human control, SOD1-ALS and TDP-43-ALS iPSCs using a single SeV vector encoding Lhx3, Ngn2, and Isl1**

(a) Immunofluorescence staining for NANOG and SSEA4 in human iPSCs derived from an SOD1-ALS patient. Scale bar, 30  $\mu$ m. (b) Genomic DNA sequences for SOD1 mutation in human SOD1-ALS iPSCs. (c) Immunofluorescence staining of Tuj1 and HB9 in cells induced *via* SeV-L-N-I. Scale bars, 20  $\mu$ m. (d) Immunofluorescence staining of Tuj1 and ChAT in cells induced *via* SeV-L-N-I. Scale bars, 20  $\mu$ m. (e) SOD1-ALS iPSC-derived non-MNs were immunostained



with misfolded SOD1 and Tuj1 antibodies. Scale bar, 10  $\mu$ m. (f) TDP-43-ALS iPSC-derived non-MNs were immunostained with TDP-43 and HB9 antibodies. Scale bar, 10  $\mu$ m.

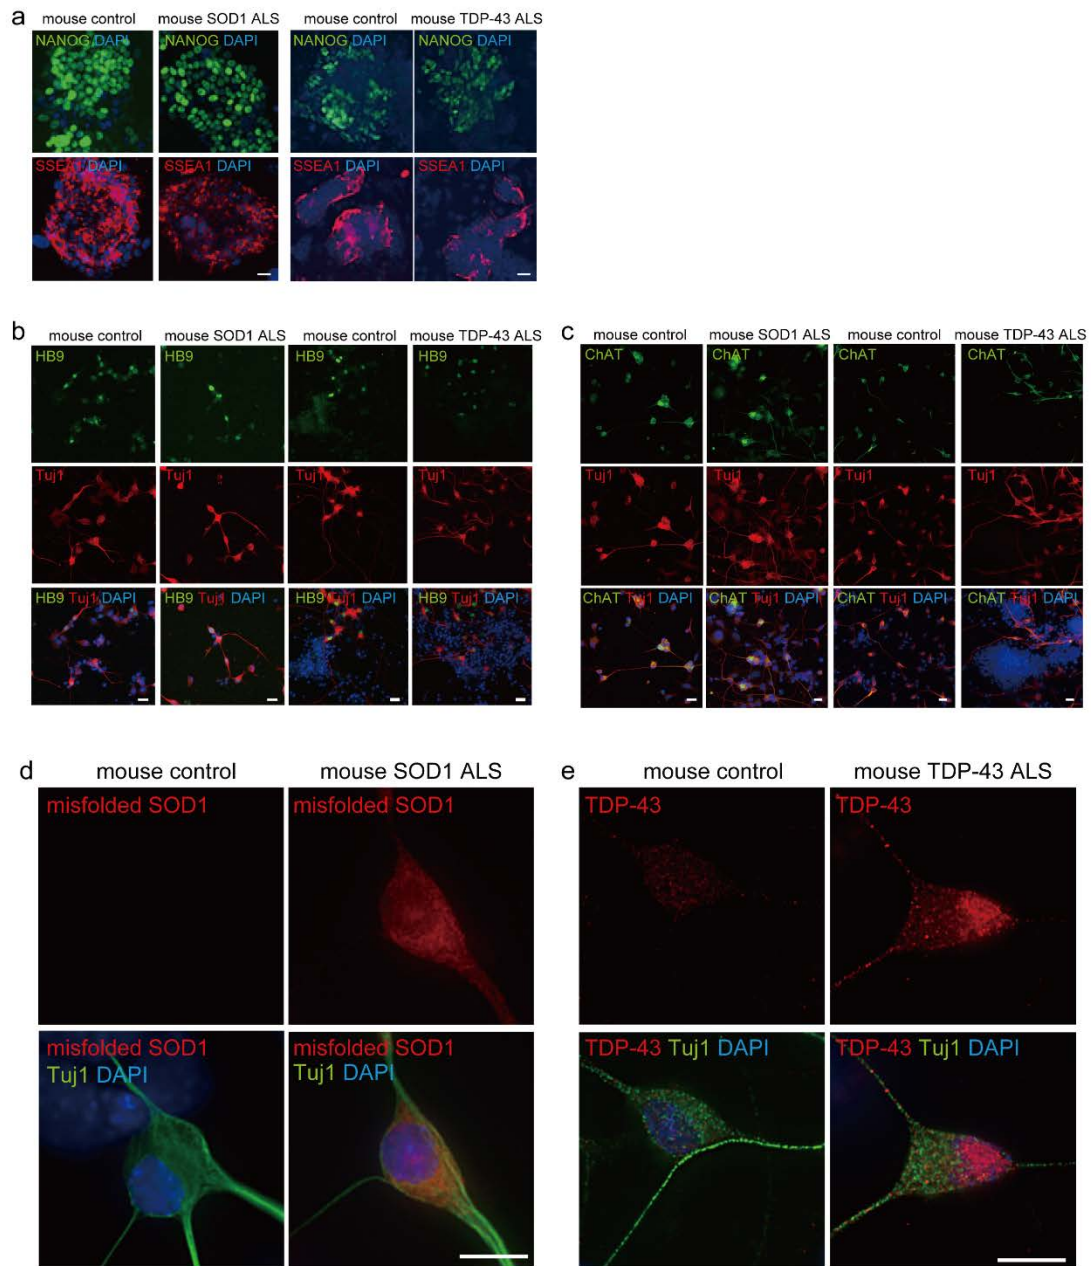

**Figure S6. Phenotypes of SOD1-ALS and TDP-43-ALS mouse iPSC-derived neurons by a single SeV vector encoding Lhx3, Ngn2, and Isl1.** (a) Immunofluorescence staining for NANOG and SSEA1 in control, SOD1-ALS and TDP-43-ALS mouse iPSCs. Scale bar, 30  $\mu$ m. (b) Immunofluorescence staining of Tuj1 and HB9 in cells induced *via* SeV-L-N-I. Scale bars, 20  $\mu$ m. (c) Immunofluorescence staining of Tuj1 and ChAT in cells induced *via* SeV-L-N-I.

Scale bar, 20  $\mu\text{m}$ . (d) Control and SOD1-ALS mouse iPSC-derived MNs immunostained for misfolded SOD1 and Tuj1. Scale bar, 10  $\mu\text{m}$ . (e) Control and TDP-43-ALS mouse iPSC-derived MNs were immunostained for TDP-43 and Tuj1. Scale bar, 10  $\mu\text{m}$ .

**Table S1. MN differentiation from iPSCs using signaling molecules.**

| Reference                 | Compounds for MN induction                          | Efficiency of MN differentiation                        | Days from iPSCs to MNs |
|---------------------------|-----------------------------------------------------|---------------------------------------------------------|------------------------|
| Dimos et al., 2008        | RA, SHH agonist                                     | 20% (HB9+ / all cells)                                  | 38 days                |
| Ebert et al., 2009        | RA, SHH                                             | 12.6 ± 2.2%, 9.5 ± 2.4% (ChAT+ and Tuj1+ / total cells) | 28 days                |
| Karumbayaram et al., 2009 | RA, SHH                                             | 28.2 ± 5.7%, 33.6 ± 12% (ISL1+ / Tuj1+)                 | 35-49 days             |
| Zeng et al., 2010         | RA, SHH                                             | ~20% (HB9+ / total cells)                               | 35 days                |
| Mitne-Neto et al., 2011   | RA, SHH                                             | ~5% (HB9+ / total cells)                                | 49 days                |
| Amoroso et al., 2013      | SB431542, LDN193189, RA, SAG, PUR                   | 27 ± 1% (HB9+ or ISL1+ / DAPI)                          | 21 days                |
| Sareen et al., 2013       | ATRA, purmorphamine                                 | 33-45% (SMI32+ / total cells)                           | 49 days                |
| Qu et al., 2014           | Compound C, RA, SHH,                                | ~2%, 51.6 ± 5.7% (HB9+ / DAPI)                          | 18 days                |
| Grunseich et al., 2014    | SB431542, LDN193189, RA, SAG, PUR                   | 20-30% (HB9+ / total cells)                             | 21-30 days             |
| Maury et al., 2015        | SB431542, LDN193189, SAG, RA, CHIR99021, FGF2, DAPT | 74% (HB9+ and ISL1+ / neurons)                          | 14 days                |
| Du et al., 2015           | SB431542, DMH1, PUR, RA, CHIR99021, CpdE            | 91 ± 6% (ChAT+ / neurons)                               | 28 days                |

Abbreviations: RA, retinoic acid; SHH, sonic hedgehog; SAG, smoothed agonist; PUR,

purmorphamine; ATRA, all-trans retinoic acid; FGF2, fibroblast growth factor 2; DAPT, N-[N-

(3,5-difluorophenacetyl)-l-alanyl]-S-phenylglycine t-butyl ester; Cpd E, Compound E.

**Table S2. MN differentiation from ESCs/iPSCs or fibroblasts using transcription factors**

(TFs).

| Reference             | Initial source  | TFs for MN induction                               | Efficiency of MN differentiation       | HB9 or Phox2b detected days from ESCs/iPSCs | Medium  |
|-----------------------|-----------------|----------------------------------------------------|----------------------------------------|---------------------------------------------|---------|
| Hester et al., 2011   | Human ESCs/iPSC | Ngn2, Isl1, Lhx3                                   | 55% (HB9+ / DAPI)                      | 21 days                                     | 3 types |
| Son et al., 2011      | HEF             | Ascl1, Brn2, Myt1l, Lhx3, Hb9, Isl1, Ngn2, NeuroD1 | ~0.01% (Hb9+ / HEF)                    | 30 days                                     | 2 types |
| Son et al., 2011      | MEF             | Ascl1, Brn2, Myt1l, Lhx3, Hb9, Isl1, Ngn2          | 5-10% (Hb9+ / MEF)                     | 5 days                                      | 2 types |
| Mazzioni et al., 2013 | Mouse ESC       | Ngn2, Isl1, Lhx3                                   | 99.82 ± 0.17 (Hb9+ / transgenic cells) | 1 day                                       | 2 types |
| Mazzioni et al., 2013 | Mouse ESC       | Ngn2, Isl1, Phox2a                                 | 99.03% (Phox2b+ / transgenic cells)    | 3 days                                      | 2 types |
| This study            | Human iPSC      | Ngn2, Isl1, Lhx3                                   | 92.8 ± 1.2% (HB9+ / infected cells)    | 2 days                                      | 1 type  |

Abbreviations: ESC, embryonic stem cell; HEF, human embryonic fibroblast; MEF, mouse embryonic fibroblast.

**Table S3. Comparison of virus vectors**

| Vector       | Genetic material | Vector genome forms                | Tropism        | Packaging capacity |
|--------------|------------------|------------------------------------|----------------|--------------------|
| Retrovirus   | RNA              | Integrated                         | Dividing cells | ~8kb               |
| Lentivirus   | RNA              | Integrated                         | Broad          | ~8kb               |
| Adenovirus   | DNA              | Episomal                           | Broad          | ~8-30kb            |
| AAV          | DNA              | Episomal (90%)<br>Integrated (10%) | Broad          | ~5kb               |
| Sendai virus | RNA              | Episomal                           | Broad          | ~5kb               |

Abbreviations: AAV, adeno-associated virus

**Table S4.** List of human iPSC clones

|                             | human iPSC clone |            |             |                |
|-----------------------------|------------------|------------|-------------|----------------|
| Clone name in this study    | HB9-EGFP knockin | control    | SOD1 ALS    | TDP-43 ALS     |
| Clone name at establishment | 24-13            | 201B7      | A30-1-1-1   | A3411          |
| Sex                         | Male             | Female     | Female      | Female         |
| Donor Age                   | New born         | 38         | 51          | 62             |
| Origin                      | Fibroblast       | Fibroblast | Fibroblast  | Fibroblast     |
| Reprogramming vector        | Retrovirus       | Retrovirus | Episomal    | Episomal       |
| Mutation                    | —                | —          | SOD1 (H46R) | TDP-43 (M337V) |

**Table S5.** List of mouse iPSC clones

|                             | mouse iPSC clone |                |                  |                  |
|-----------------------------|------------------|----------------|------------------|------------------|
| Clone name in this study    | control (SOD1)   | mouse SOD1 ALS | control (TDP-43) | mouse TDP-43 ALS |
| Clone name at establishment | N-4              | G-10           | M7-5             | M5-3             |
| Origin                      | MEF              | MEF            | MEF              | MEF              |
| Reprogramming vector        | Retrovirus       | Retrovirus     | Retrovirus       | Retrovirus       |
| Mutation                    | —                | SOD1 (G93A)    | —                | TDP-43 (A315T)   |

**Table S6.** List of primers

| Primers   | Sequences (5' to 3')           | Applications |
|-----------|--------------------------------|--------------|
| HB9-Fw    | tgcctaagatgcccgactt            | qPCR         |
| HB9-Rv    | agctgctggctgggaag              | qPCR         |
| ChAT-Fw   | tgaaacctacctgatgagcaac         | qPCR         |
| ChAT-Rv   | agcagaacatctccgtggtt           | qPCR         |
| MAP2-Fw   | caggtggcggacgtgtgaaaattgagagtg | qPCR         |
| MAP2-Rv   | cacgtggatctgcctggggactgtg      | qPCR         |
| HOXB4-Fw  | ctggatgcgcaaagttcac            | qPCR         |
| HOXB4-Rv  | ttccttctccagctccaaga           | qPCR         |
| HOXC6-Fw  | ccaggaccagaaagccagta           | qPCR         |
| HOXC6-Rv  | ggtaccgcgagtagatctgg           | qPCR         |
| HOXC9-Fw  | cagcaagcacaagaggaga            | qPCR         |
| HOXC9-Rv  | tccagcgtctggtacttgg            | qPCR         |
| HOXC10-Fw | gacacctcgataacgaagc            | qPCR         |
| HOXC10-Rv | cctcttctcctccgctct             | qPCR         |
| GAPDH-Fw  | tccactggcgtcttacc              | qPCR         |
| GAPDH-Rv  | ggcagagatgatgaccctttt          | qPCR         |

**Movie S1. Time-lapse imaging of EGFP-positive cells induced with a single SeV vector encoding Lhx3, Ngn2, and Isl1 to HB9-EGFP knock-in human iPSCs.**

Time-lapse imaging was conducted from Day 1. The images were captured every 30 minutes.

Recording duration was 50 hours.
